# Supplementary material for: Identification, Structural Characterization and Gene Expression Analysis of Members of the Nuclear Factor-Y Family in Chickpea (Cicer arietinum L.) under Dehydration and Abscisic Acid Treatments
Source: MDPI journal article supplement (doi:10.3390/ijms19113290), 2018-10-23
Supplement: s1 [file s1]

**Figure S1A. The multiple alignments of full-length CaNF-YA TFs as determined using Clustal X (v. 2.1) software.**

Conserved domains were indicated by thick black lines above the sequences. The conserved residues were marked in white color in the black background.

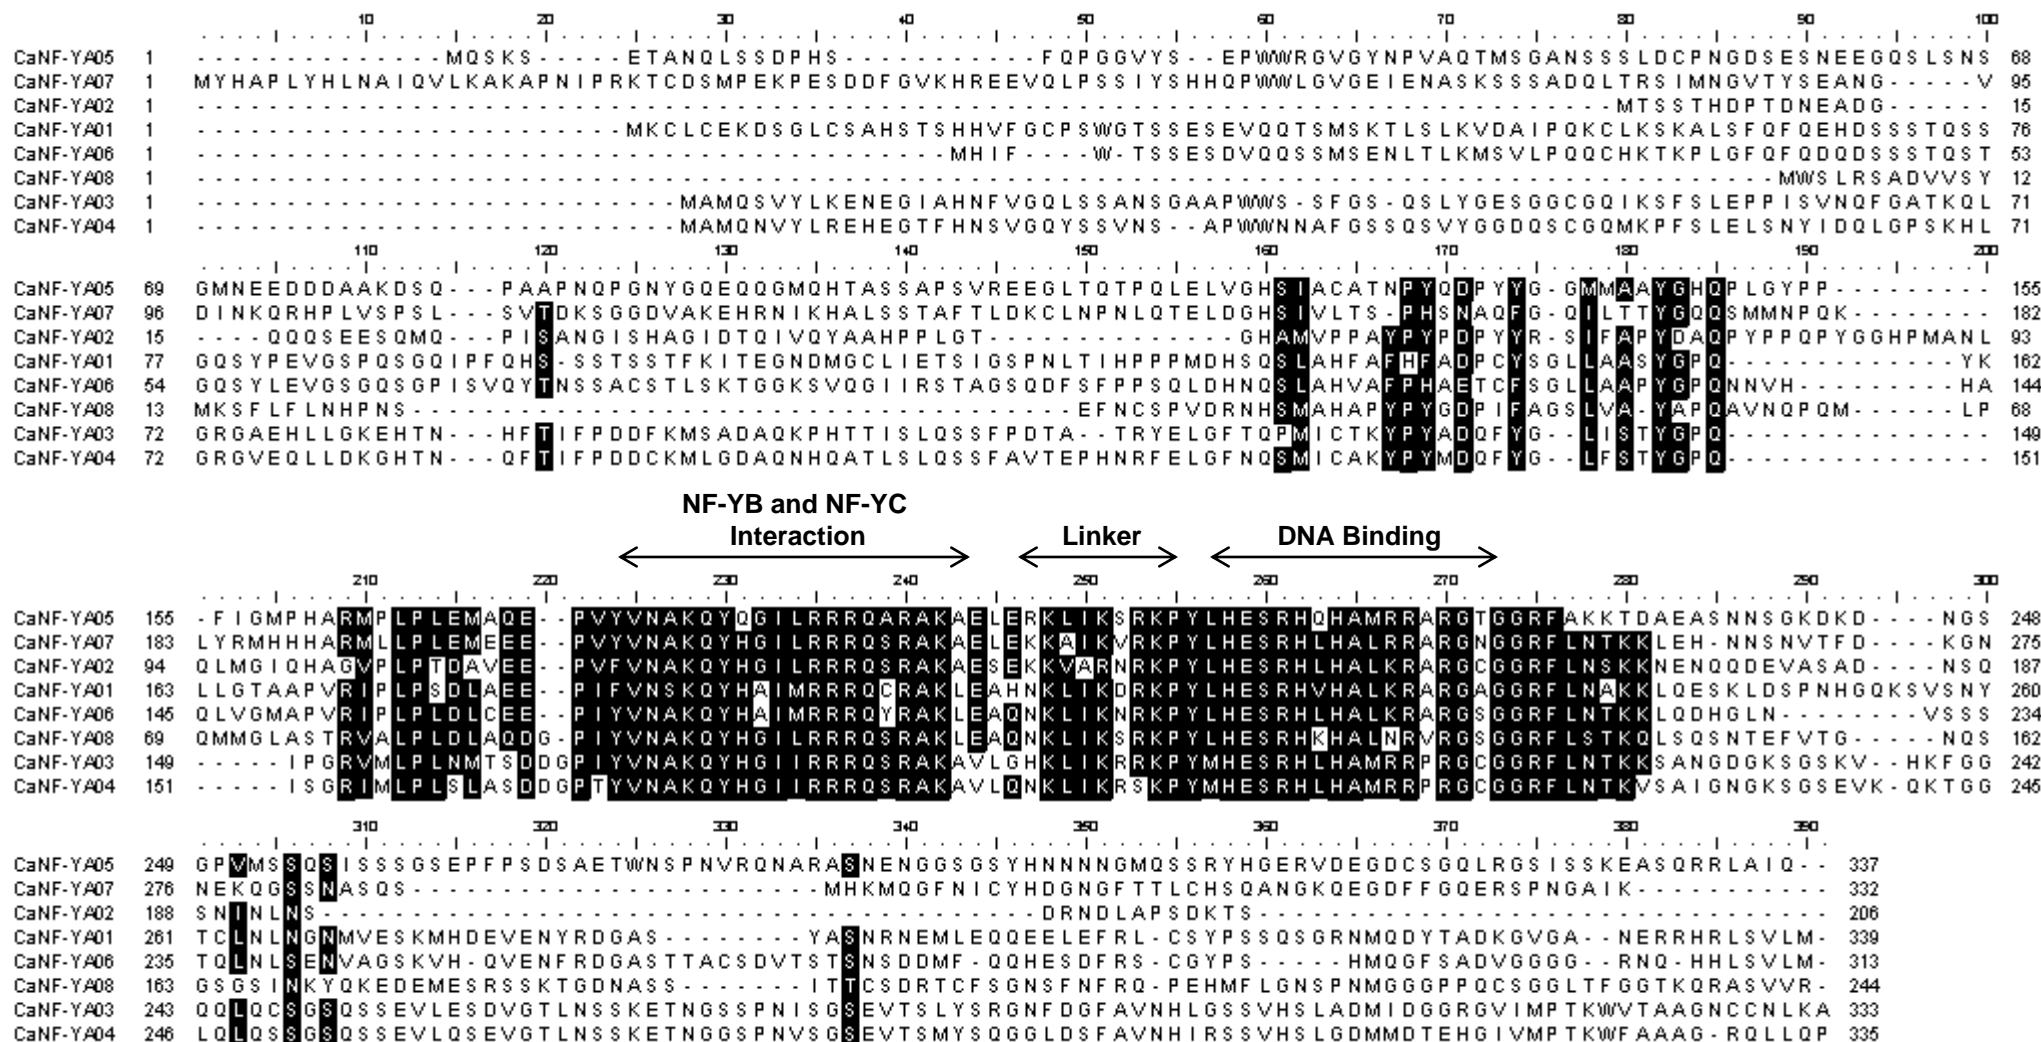

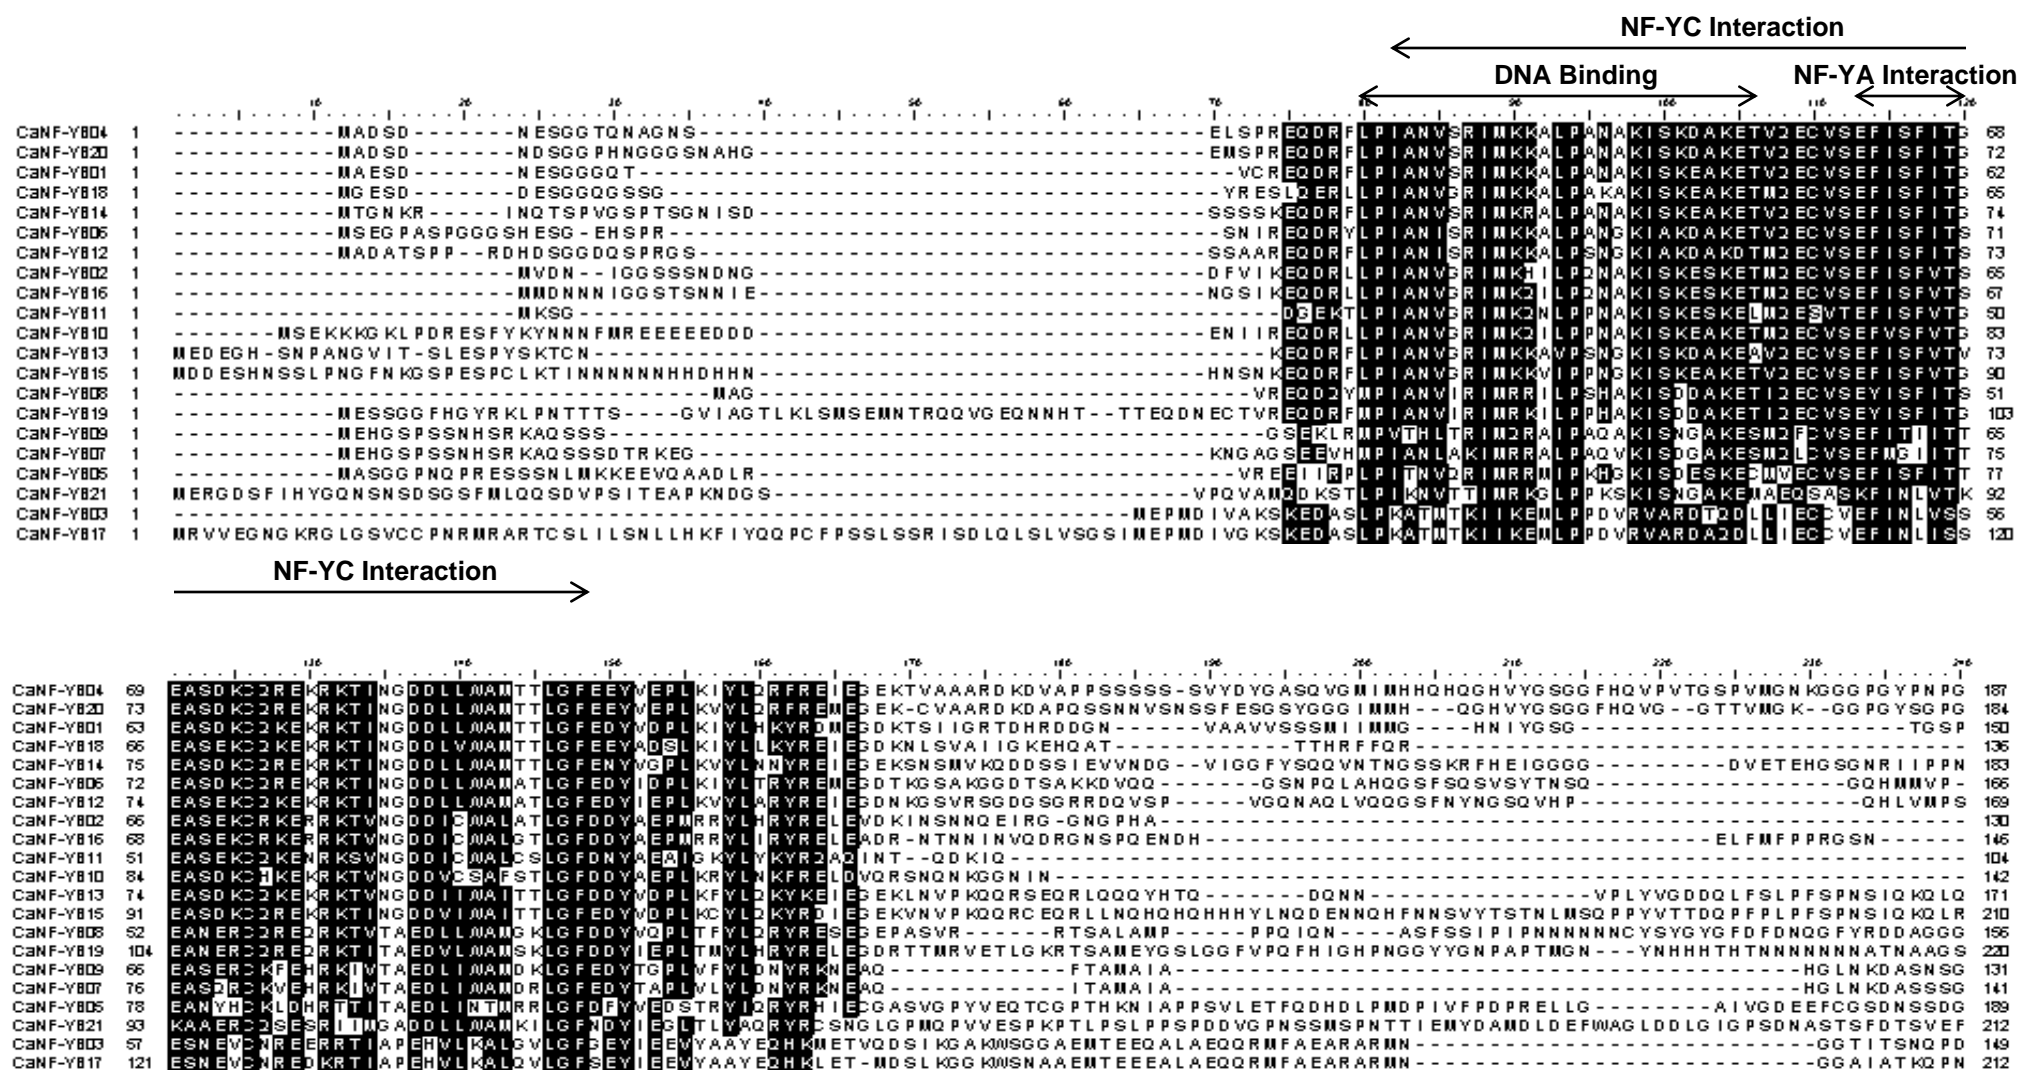

**Figure S1B. The multiple alignments of full-length CaNF-YB TFs as determined using Clustal X (v. 2.1) software. Conserved domains were indicated by thick black lines above the sequences. The conserved residues were marked in white color in the black background.**

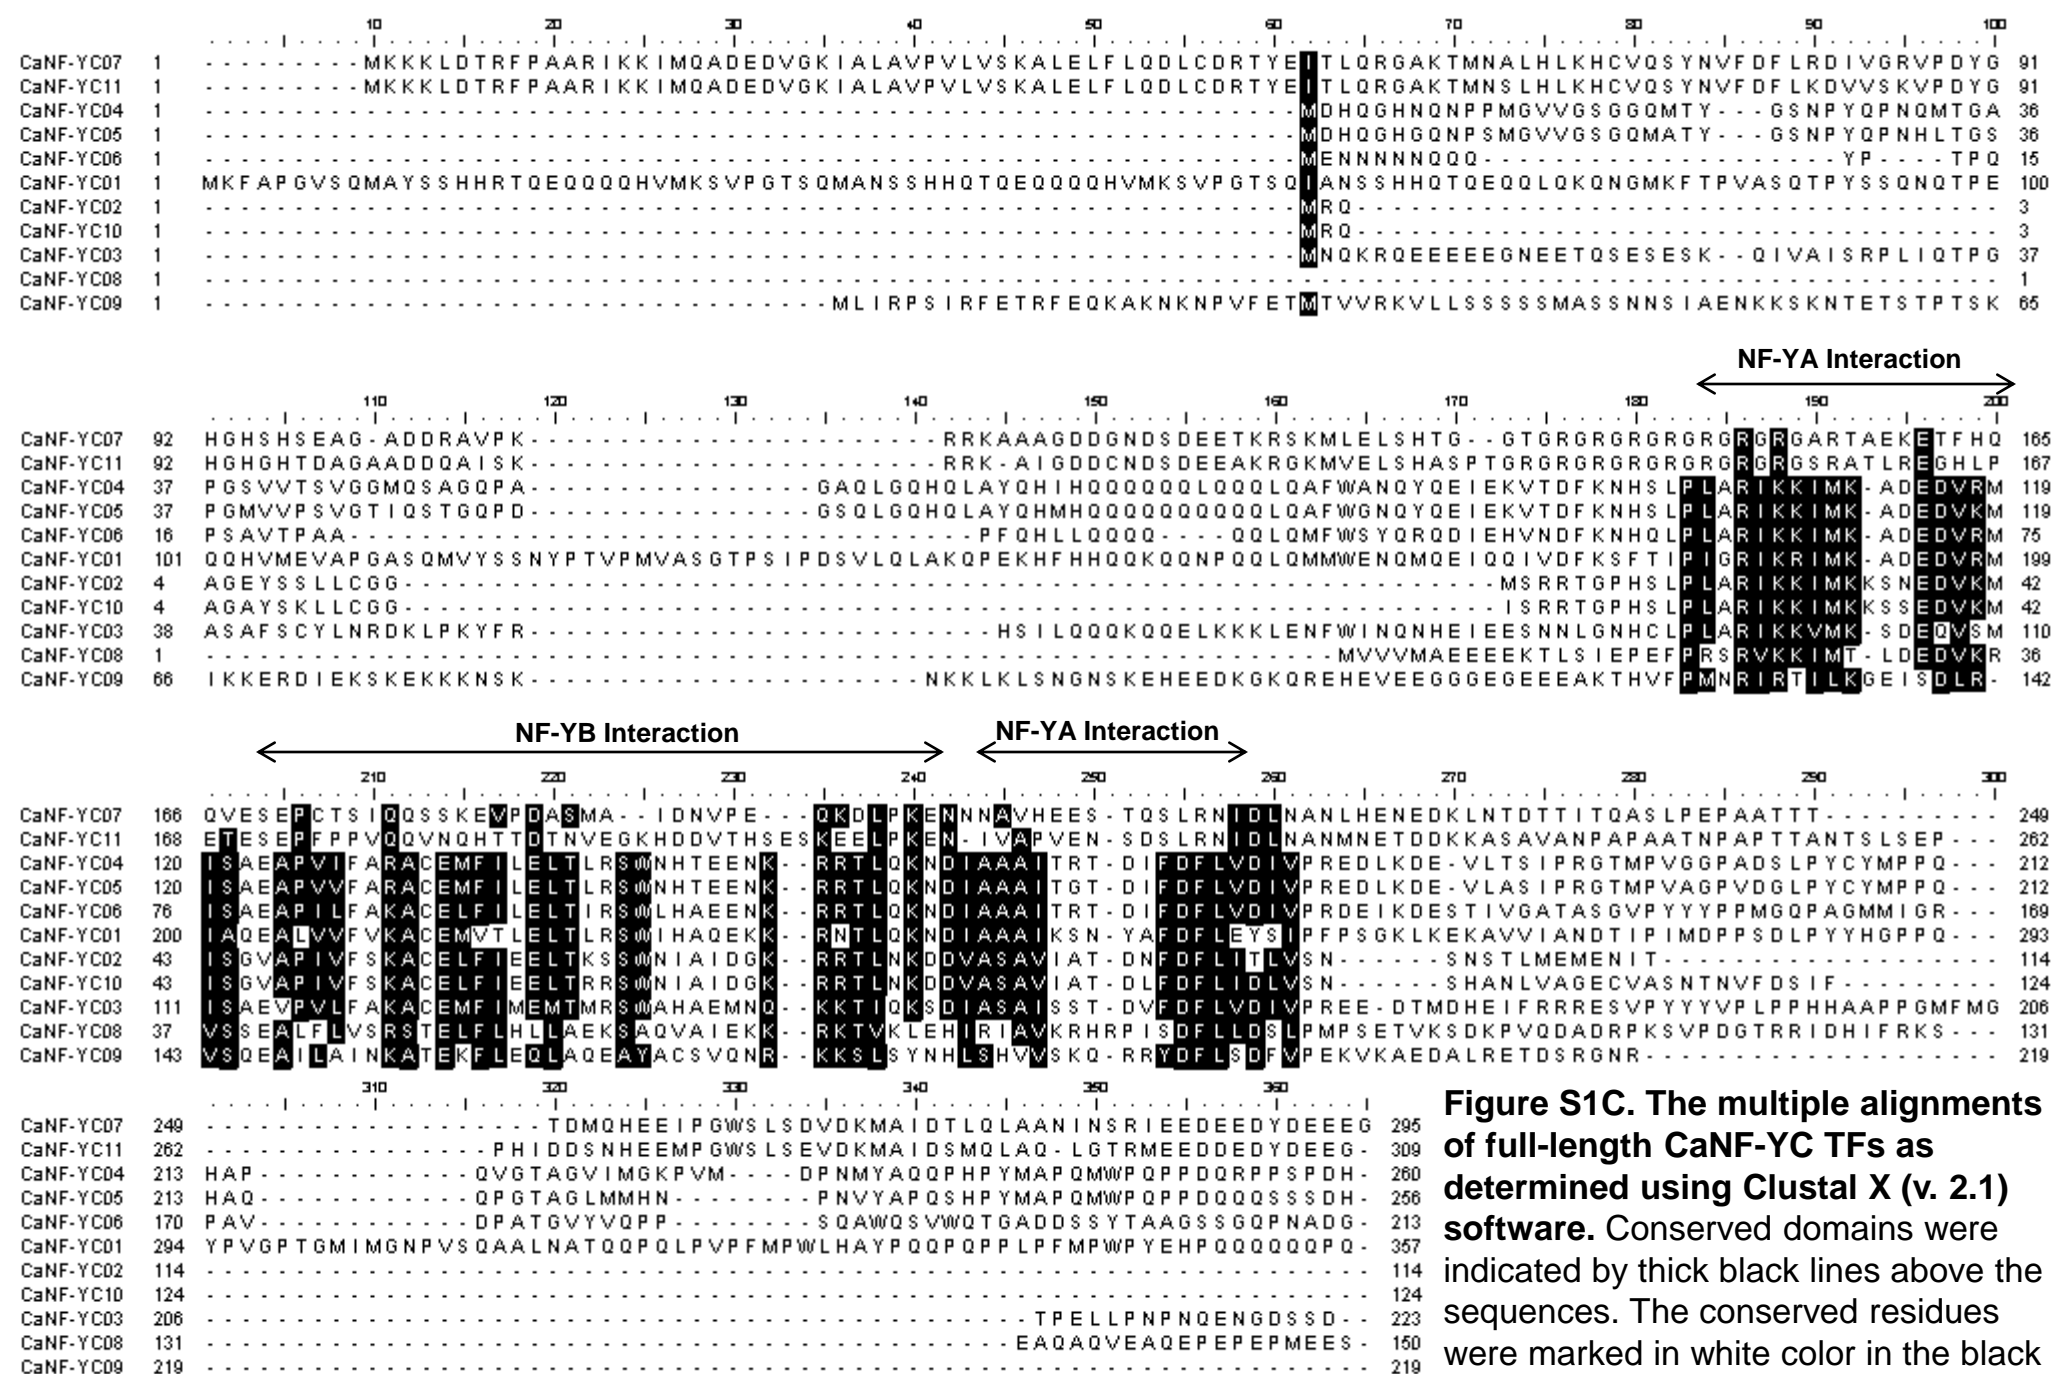

**Figure S1C. The multiple alignments of full-length CaNF-YC TFs as determined using Clustal X (v. 2.1) software.** Conserved domains were indicated by thick black lines above the sequences. The conserved residues were marked in white color in the black background.
